# Supplementary material for: Development of an umbilical cord blood transplantation–specific nonrelapse mortality risk assessment score
Source: PubMed Central journal article supplement — Blood Adv. 2024 Jan 3;8(6):1359–68. doi: 10.1182/bloodadvances.2023011837 (PMC10945135; doi:10.1182/bloodadvances.2023011837), 2024-01-03

1 **Supplemental Table 1 NRM at 2 years according to the CoBRA score in the training**  
 2 **cohort.**

| The CoBRA score | Risk group   | n   | NRM at 2 years (95% CI) (%) |
|-----------------|--------------|-----|-----------------------------|
| 1               | Low          | 15  | 6.7 (0.4 - 27.0)            |
| 2               |              | 111 | 17.3 (10.9 - 25.0)          |
| 3               |              | 340 | 13.1 (9.8 - 17.0)           |
| 4               |              | 516 | 18.0 (14.8 - 21.5)          |
| 5               | Intermediate | 552 | 22.3 (18.9 - 25.9)          |
| 6               |              | 451 | 29.8 (25.6 - 34.1)          |
| 7               |              | 319 | 37.2 (31.9 - 42.6)          |
| 8               | High         | 198 | 42.6 (35.5 - 49.4)          |
| 9               |              | 111 | 50.3 (40.5 - 59.3)          |
| 10-11           |              | 74  | 56.8 (44.5 - 67.3)          |

3

4 **Supplemental Table 2 NRM at 2 years according to the CoBRA score in the validation**  
5 **cohort.**

| The CoBRA score | Risk group   | n   | NRM at 2 years (95% CI) (%) |
|-----------------|--------------|-----|-----------------------------|
| 1               | Low          | 15  | 0.0 (0.0 - 0.0)             |
| 2               |              | 80  | 6.6 (2.4 - 13.9)            |
| 3               |              | 211 | 13.0 (8.5 - 18.6)           |
| 4               |              | 338 | 18.4 (14.0 - 23.3)          |
| 5               | Intermediate | 377 | 18.8 (14.5 - 23.6)          |
| 6               |              | 318 | 28.3 (22.6 - 34.3)          |
| 7               |              | 229 | 32.0 (25.6 - 38.6)          |
| 8               | High         | 96  | 46.8 (35.3 - 57.4)          |
| 9               |              | 55  | 49.2 (34.3 - 62.6)          |
| 10-11           |              | 31  | 40.6 (19.4 - 61.0)          |

6

7 **Supplemental Figure 1 Clinical outcomes according to transplant year.**

8 The cumulative incidence of (A) NRM and (B) Relapse. (C) OS and (D) PFS.

9  
10 **Supplemental Figure 2 Flowchart for recipient selection.**

11 AML, acute myeloid leukemia; ALL, acute lymphoblastic leukemia; MDS, myelodysplastic  
12 syndrome; MPN, myeloproliferative neoplasms; ATL, adult T-cell leukemia-lymphoma; UCB,  
13 umbilical cord blood; GVHD, graft-versus-host disease; CNI, calcineurin inhibitor; MTX,  
14 methotrexate; MMF, mycophenolate mofetil; DRI, disease risk index; CR, complete remission;  
15 CFU-GM, granulocyte-monocyte colony forming unit; HCT-CI, hematopoietic cell transplant-  
16 specific comorbidity index; PS, performance status; HCT, hematopoietic cell transplantation.

17  
18 **Supplemental Figure 3 NRM according to recipient/donor sex.**

19 F to F; female donor to female recipient, F to M; female donor to male recipient, M to F; male  
20 donor to female recipient, M to M; male donor to male recipient.

21  
22 **Supplemental Figure 4 PFS and Relapse.**

23 (A) PFS and (B) the cumulative incidence of relapse in the training cohort and (C) (D) those  
24 in the validation cohort.

25  
26 **Supplemental Figure 5 NRM and OS in the validation cohort excluding ATL.**

27 (A) The cumulative incidence of NRM and (B) OS in the validation cohort excluding ATL.

28  
29 **Supplemental Figure 6 The calibration plot.**

30 The value predicted by the CoBRA score (x-axis) and the observed NRM (y-axis).

31

32 **Supplemental Figure 7 NRM risks based on conditioning regimen.**

33 \* The multivariable Cox regression analysis for NRM were used for interaction analysis. We  
34 identified significant interaction terms when a P-value of less than 0.05 was obtained.

35

36 **Supplemental Figure 8 Engraftment.**

37 The cumulative incidence of (A) neutrophil and (B) platelet engraftment in the entire cohort.

38

39 **Supplemental Figure 9 GVHD.**

40 The cumulative incidence of (A) grade II to IV, (B) grade III to IV acute GVHD, and (C) chronic  
41 and (D) extensive chronic GVHD in the entire cohort.

# Supplemental Figure 1

**A**

Non-relapse mortality

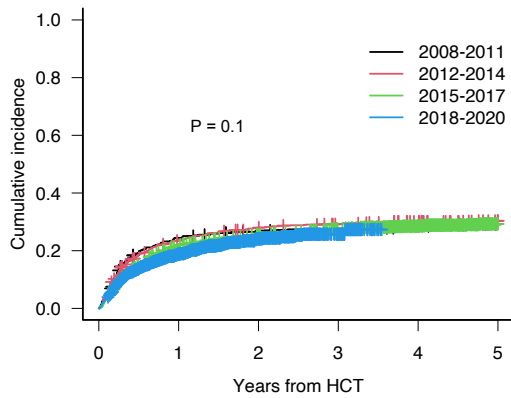

|           | Number at risk |     |     |     |     |     |
|-----------|----------------|-----|-----|-----|-----|-----|
|           | 0              | 1   | 2   | 3   | 4   | 5   |
| 2008-2011 | 491            | 243 | 209 | 197 | 188 | 173 |
| 2012-2014 | 900            | 458 | 383 | 356 | 332 | 304 |
| 2015-2017 | 1296           | 717 | 619 | 553 | 396 | 162 |
| 2018-2020 | 1750           | 762 | 330 | 79  | 0   | 0   |

**B**

Relapse

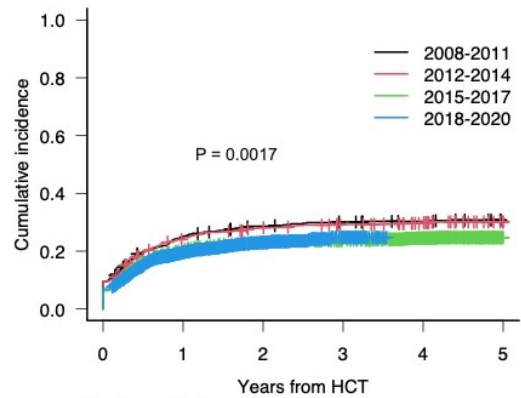

|           | Number at risk |     |     |     |     |     |
|-----------|----------------|-----|-----|-----|-----|-----|
|           | 0              | 1   | 2   | 3   | 4   | 5   |
| 2008-2011 | 491            | 243 | 209 | 197 | 188 | 173 |
| 2012-2014 | 900            | 458 | 383 | 356 | 332 | 304 |
| 2015-2017 | 1296           | 717 | 619 | 553 | 396 | 162 |
| 2018-2020 | 1750           | 762 | 330 | 79  | 0   | 0   |

**C**

Overall survival

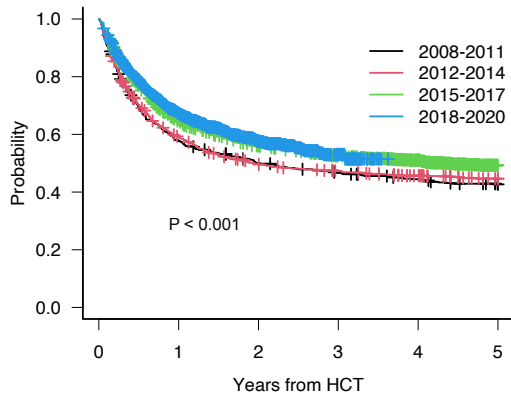

|           | Number at risk |     |     |     |     |     |
|-----------|----------------|-----|-----|-----|-----|-----|
|           | 0              | 1   | 2   | 3   | 4   | 5   |
| 2008-2011 | 491            | 278 | 236 | 217 | 202 | 186 |
| 2012-2014 | 900            | 517 | 426 | 399 | 370 | 338 |
| 2015-2017 | 1296           | 793 | 663 | 588 | 425 | 167 |
| 2018-2020 | 1750           | 830 | 360 | 85  | 0   | 0   |

**D**

Progression-free survival

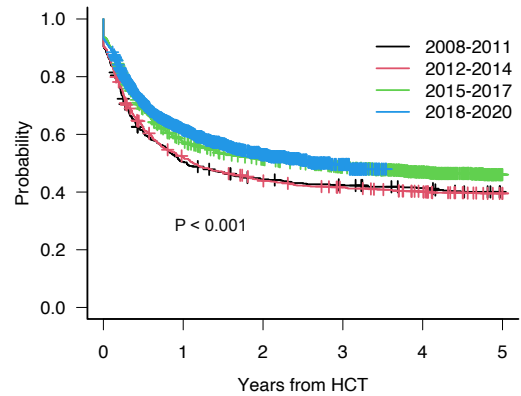

|           | Number at risk |     |     |     |     |     |
|-----------|----------------|-----|-----|-----|-----|-----|
|           | 0              | 1   | 2   | 3   | 4   | 5   |
| 2008-2011 | 491            | 243 | 209 | 197 | 188 | 173 |
| 2012-2014 | 900            | 458 | 383 | 356 | 332 | 304 |
| 2015-2017 | 1296           | 717 | 619 | 553 | 396 | 162 |
| 2018-2020 | 1750           | 762 | 330 | 79  | 0   | 0   |

## Supplemental Figure 2

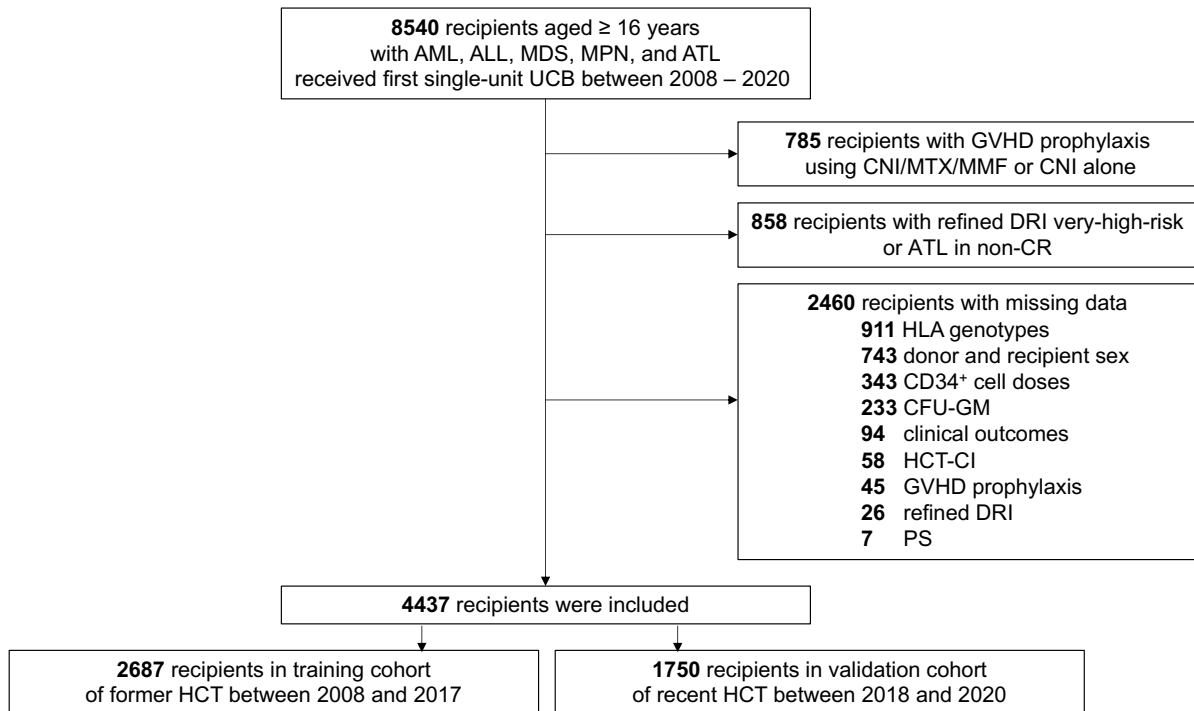

Supplemental Figure 3

Non-relapse mortality

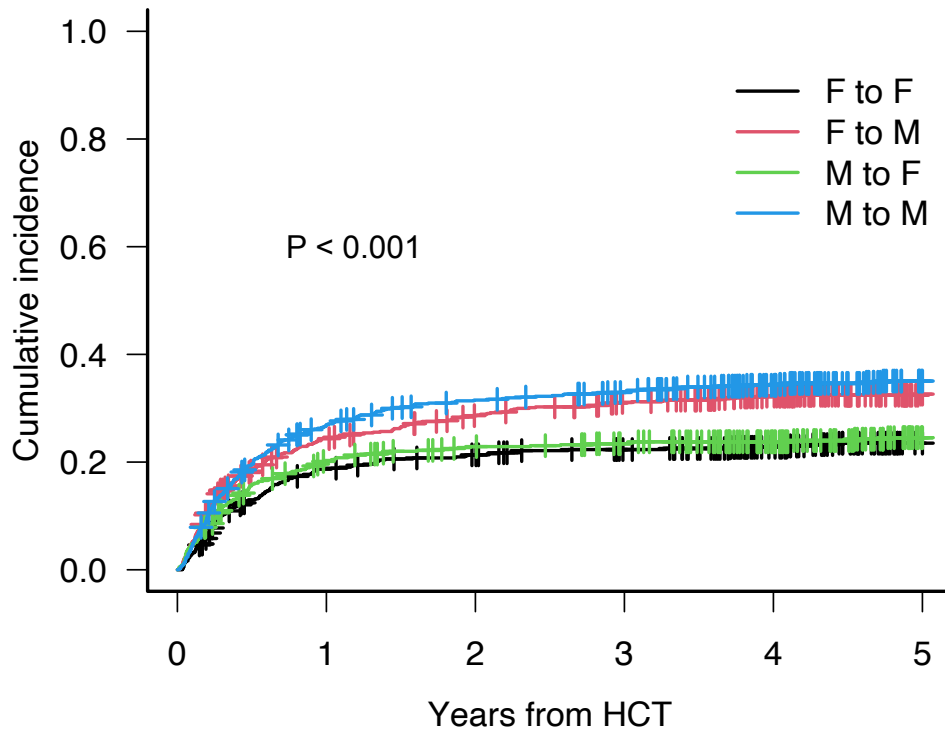

|        | Number at risk |     |     |     |     |     |
|--------|----------------|-----|-----|-----|-----|-----|
| F to F | 543            | 311 | 273 | 253 | 206 | 144 |
| F to M | 784            | 391 | 325 | 292 | 252 | 181 |
| M to F | 606            | 340 | 296 | 271 | 224 | 149 |
| M to M | 754            | 376 | 317 | 290 | 234 | 165 |

# Supplemental Figure 4

**A**

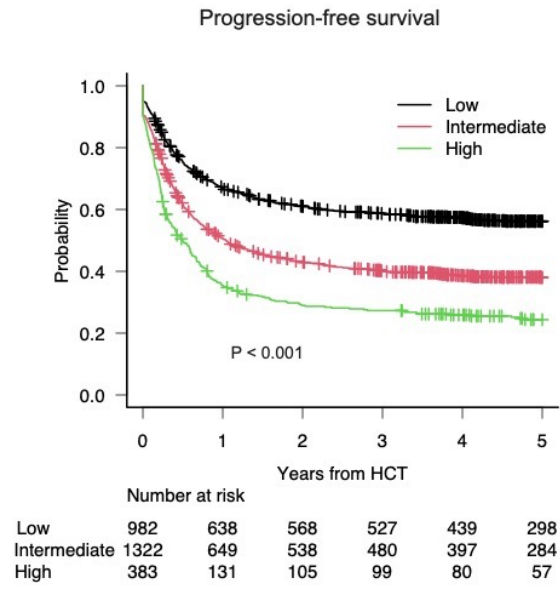

**B**

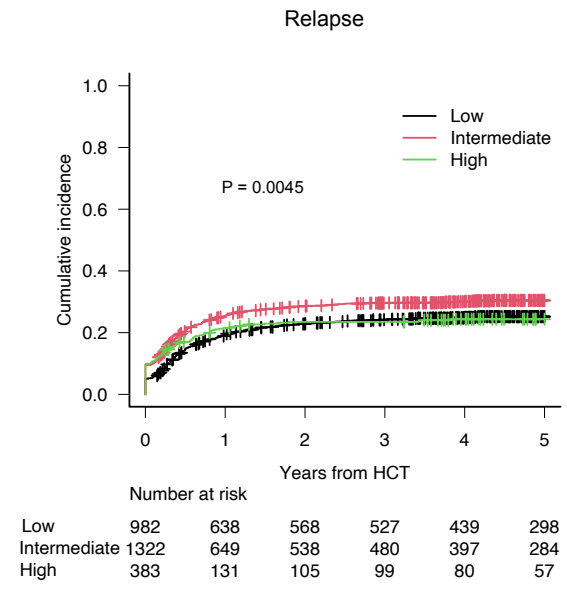

**C**

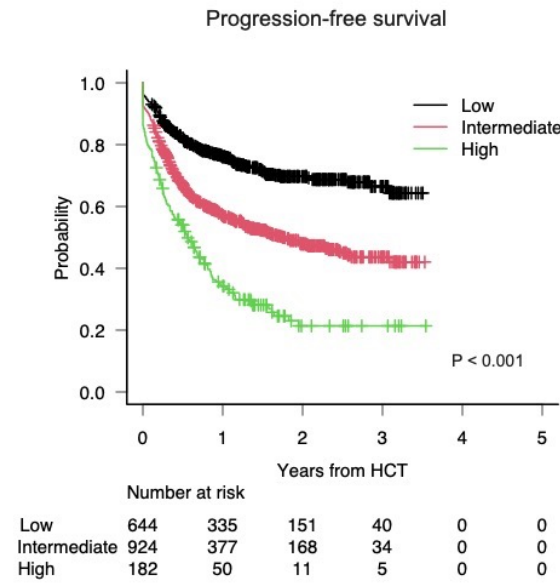

**D**

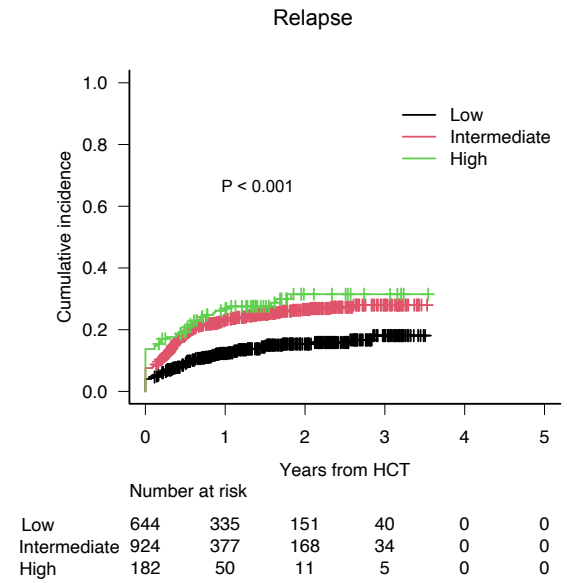



## Supplemental Figure 5

**A**

### Non-relapse mortality

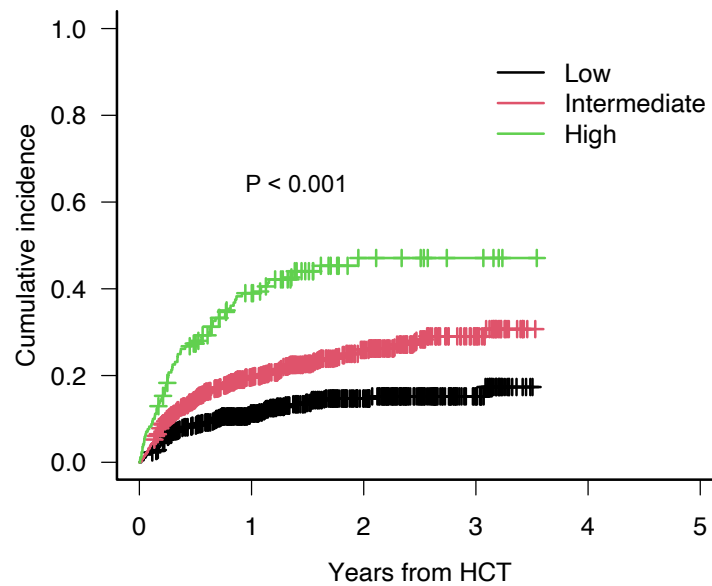

|              | Number at risk |     |     |    |   |   |
|--------------|----------------|-----|-----|----|---|---|
|              | 0              | 1   | 2   | 3  | 4 | 5 |
| Low          | 616            | 325 | 148 | 39 | 0 | 0 |
| Intermediate | 849            | 360 | 157 | 34 | 0 | 0 |
| High         | 170            | 47  | 11  | 5  | 0 | 0 |

**B**

### Overall survival

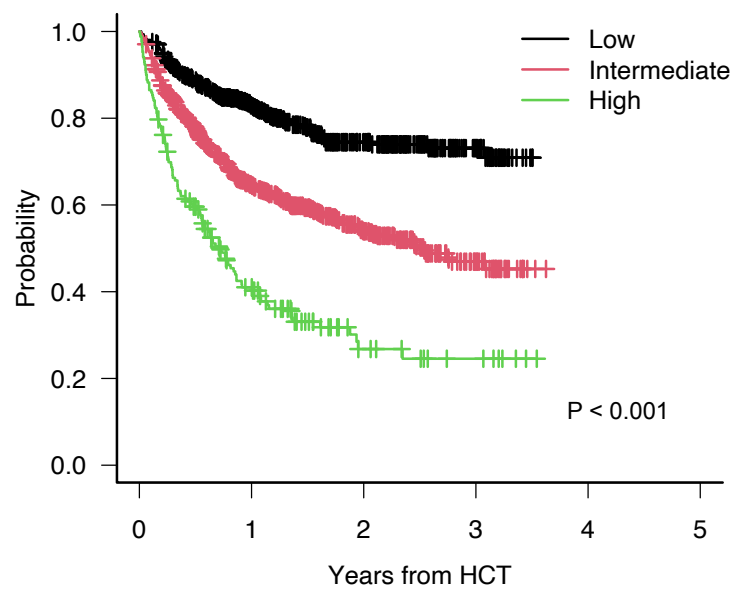

|              | Number at risk |     |     |    |   |   |
|--------------|----------------|-----|-----|----|---|---|
|              | 0              | 1   | 2   | 3  | 4 | 5 |
| Low          | 616            | 350 | 159 | 42 | 0 | 0 |
| Intermediate | 849            | 389 | 169 | 35 | 0 | 0 |
| High         | 170            | 55  | 15  | 7  | 0 | 0 |

Supplemental Figure 6

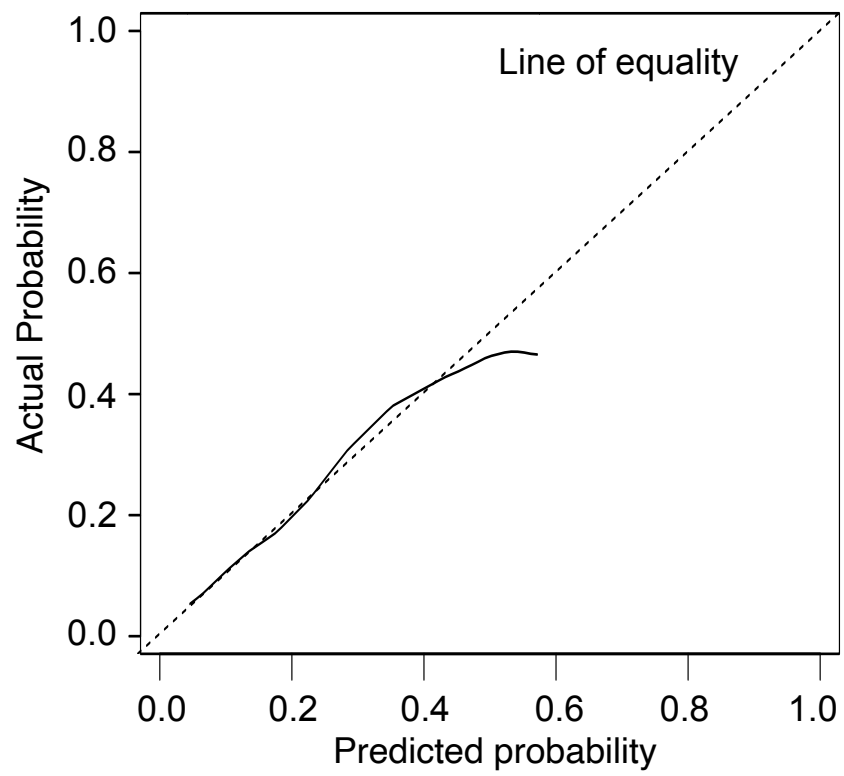

### Supplemental Figure 7

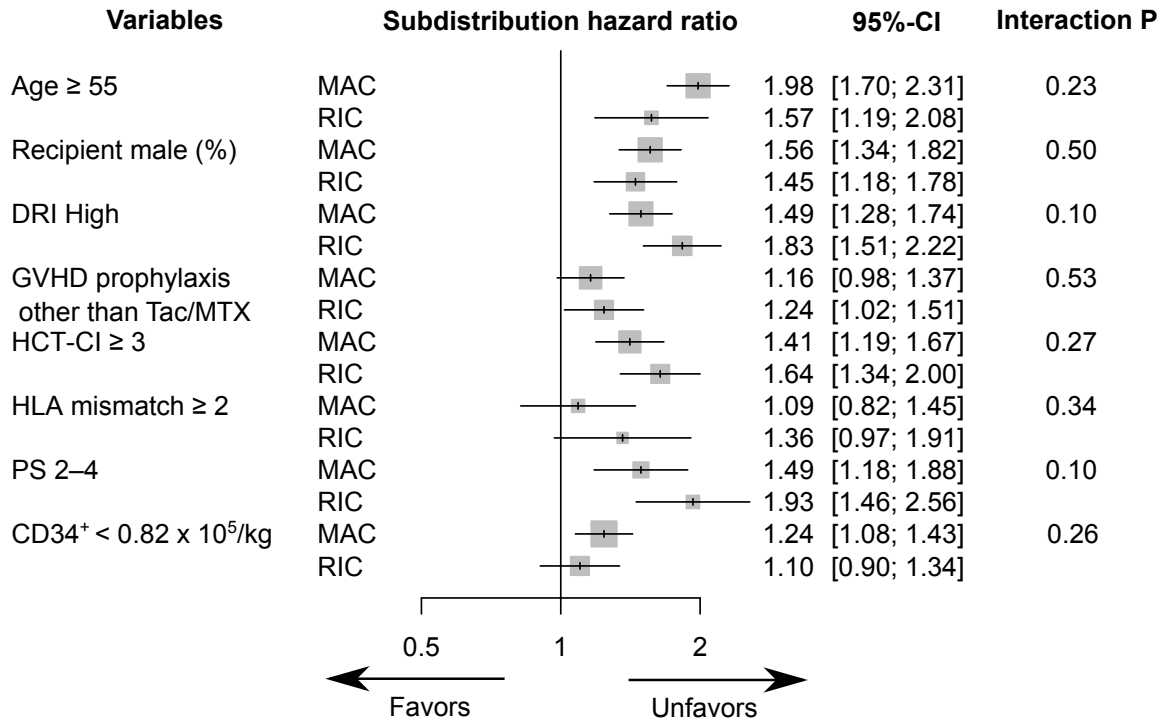

## Supplemental Figure 8

**A**

### Neutrophil engraftment

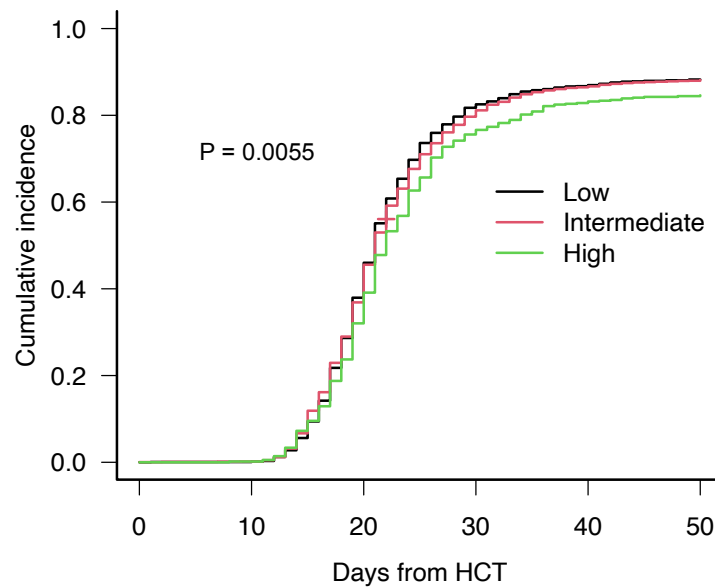

|              | Number at risk |      |      |     |     |     |
|--------------|----------------|------|------|-----|-----|-----|
| Low          | 1626           | 1616 | 981  | 256 | 169 | 137 |
| Intermediate | 2246           | 2222 | 1362 | 363 | 190 | 141 |
| High         | 565            | 548  | 345  | 80  | 33  | 22  |

**B**

### Platelet engraftment

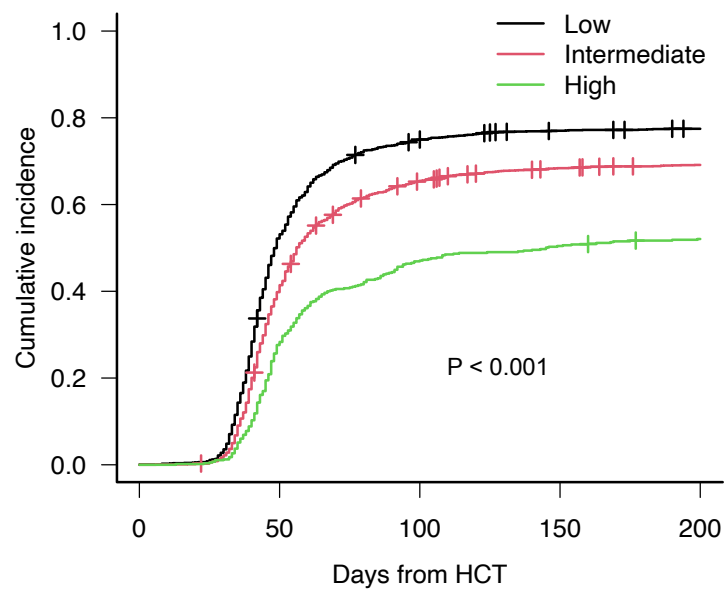

|              | Number at risk |      |     |     |     |
|--------------|----------------|------|-----|-----|-----|
| Low          | 1626           | 705  | 268 | 206 | 169 |
| Intermediate | 2245           | 1153 | 418 | 268 | 199 |
| High         | 565            | 323  | 127 | 74  | 43  |

# Supplemental Figure 9

**A**

Grade II to IV acute GVHD

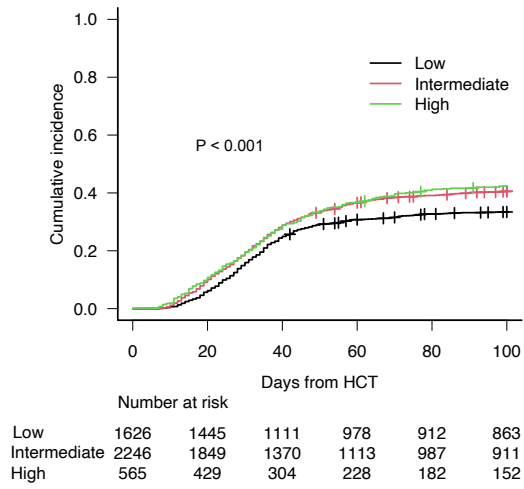

**B**

Grade III to IV acute GVHD

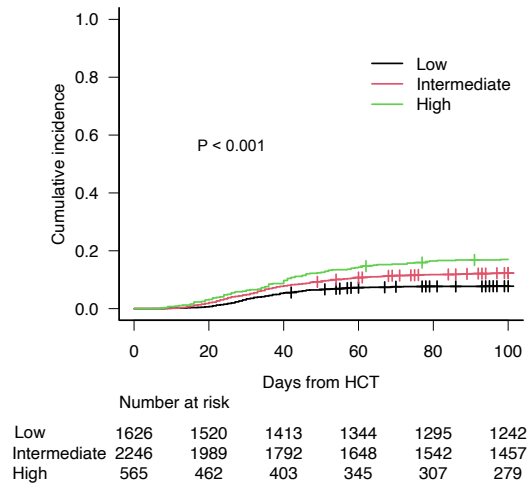

**C**

Chronic GVHD

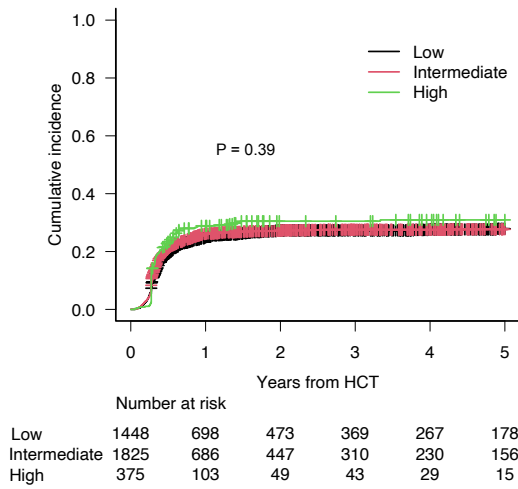

**D**

Extensive chronic GVHD

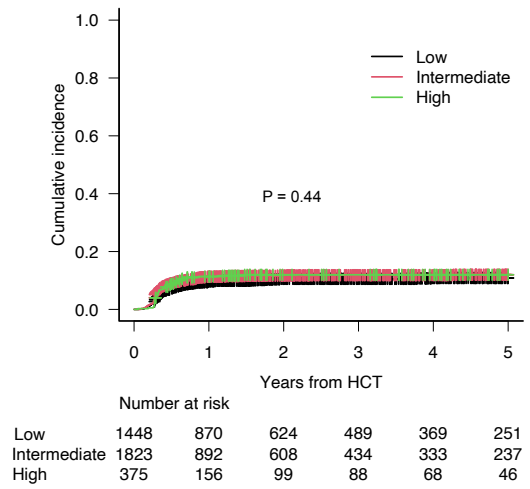

Supplement: BLOODA_ADV-2023-011837-mmc1.pdf [file BLOODA_ADV-2023-011837-mmc1.pdf]
